# Supplementary material for: Cytosine base editors induce off-target mutations and adverse phenotypic effects in transgenic mice
Source: PubMed Central journal article supplement (PMC10063651; doi:10.1038/s41467-023-37508-7), 2023-03-30
Supplement: 41467_2023_37508_MOESM3_ESM.pdf [file 41467_2023_37508_MOESM3_ESM.pdf]

**Title:** Supplementary Data 1

**Description:** *P* values for WT, BE3, YE1-BE3-FNLS or ABE7.10<sup>F148A</sup> group compared to GFP group from birth to 66 weeks.

**Title:** Supplementary Data 2

**Description:** Deep sequencing of primes for identification of integration sites.

**Title:** Supplementary Data 3

**Description:** PCR primes for confirmation of integration sites.
